# Supplementary material for: Evaluation of time profile reconstruction from complex two-color microarray designs
Source: PubMed Central journal article supplement (PMC2265676; doi:10.1186/1471-2105-9-1), 2008-01-03
Supplement: 1471-2105-9-1-S3.pdf [file 1471-2105-9-1-S3.pdf]

**Table 2S - Mean similarity between profiles for both the interwoven and loop design using different filtering thresholds**

Values in the table correspond to the similarity between any two methods, expressed as the mean profile similarity of the genes. Since the loop design is balanced with respect to the dyes, the results for Imbr and Imbr\_dye were the same (see ‘Methods’ section), which is why they are not treated differently.

A) No filtering applied, similarity is assessed for all 2999 profile estimates, B) a filtering threshold (SD) is used on all profiles estimated by each of the methods, a pairwise similarity comparison is made for all cognate profile pairs estimated by each of the two methods compared, for which at least one profile is above the filtering threshold (SD >0.1, 0.2, 0.4 respectively).

A)

|           | Interwoven design |          |           |          | Loop design    |           |          |
|-----------|-------------------|----------|-----------|----------|----------------|-----------|----------|
|           | Imbr              | Imbr_dye | limmaQual | anovaFix | Imbr/ Imbr_dye | limmaQual | anovaFix |
| Imbr_dye  | 0.9477            |          |           |          | 1.0000         |           |          |
| limmaQual | 0.9940            | 0.9359   |           |          | 0.9844         |           |          |
| anovaFix  | 0.9321            | 0.9572   | 0.9157    |          | 0.9514         | 0.9252    |          |
| anovaMix  | 0.9138            | 0.9373   | 0.8989    | 0.9767   | 0.9186         | 0.8934    | 0.9611   |

B)

SD > 0.1

|           | Interwoven design |          |           |          | Loop design    |           |          |
|-----------|-------------------|----------|-----------|----------|----------------|-----------|----------|
|           | Imbr              | Imbr_dye | limmaQual | anovaFix | Imbr/ Imbr_dye | limmaQual | anovaFix |
| Imbr_dye  | 0.9575            |          |           |          | 1.0000         |           |          |
| limmaQual | 0.995             | 0.9472   |           |          | 0.9885         |           |          |
| anovaFix  | 0.9462            | 0.9708   | 0.933     |          | 0.9681         | 0.9482    |          |
| anovaMix  | 0.9328            | 0.9558   | 0.9205    | 0.9824   | 0.9418         | 0.9226    | 0.9706   |

SD > 0.2

|           | Interwoven design |          |           |          | Loop design    |           |          |
|-----------|-------------------|----------|-----------|----------|----------------|-----------|----------|
|           | Imbr              | Imbr_dye | limmaQual | anovaFix | Imbr/ Imbr_dye | limmaQual | anovaFix |
| Imbr_dye  | 0.9732            |          |           |          | 1.0000         |           |          |
| limmaQual | 0.9972            | 0.9669   |           |          | 0.9919         |           |          |
| anovaFix  | 0.9689            | 0.989    | 0.9616    |          | 0.9856         | 0.9725    |          |
| anovaMix  | 0.9613            | 0.9798   | 0.9545    | 0.99     | 0.9629         | 0.949     | 0.9776   |

SD > 0.4

|           | Interwoven design |          |           |          | Loop design    |           |          |
|-----------|-------------------|----------|-----------|----------|----------------|-----------|----------|
|           | Imbr              | Imbr_dye | limmaQual | anovaFix | Imbr/ Imbr_dye | limmaQual | anovaFix |
| Imbr_dye  | 0.9834            |          |           |          | 1.0000         |           |          |
| limmaQual | 0.998             | 0.9799   |           |          | 0.992          |           |          |
| anovaFix  | 0.98              | 0.9948   | 0.9755    |          | 0.9961         | 0.9851    |          |
| anovaMix  | 0.9748            | 0.9905   | 0.9701    | 0.9959   | 0.9866         | 0.9728    | 0.9905   |
