# Supplementary material for: Evaluation of time profile reconstruction from complex two-color microarray designs
Source: PubMed Central journal article supplement (PMC2265676; doi:10.1186/1471-2105-9-1), 2008-01-03
Supplement: 1471-2105-9-1-S4.pdf [file 1471-2105-9-1-S4.pdf]

**Table S3:** Assessing the effect of array failure in reconstructing profiles from an interwoven design. Profile similarities were assessed using the cosine similarity. The different methods for which the influence of the failure was assessed are represented in the columns. Each row shows the mean cosine similarity between the corresponding profiles estimated from the complete design and those obtained from a defect design (where one array was removed compared to the complete design). Mean: shows the overall mean similarity for a given method.

| Number of Array removed | lmbr   | lmbr_dye | limmaQual | anovaFix | anovaMix | Conditions affected |
|-------------------------|--------|----------|-----------|----------|----------|---------------------|
| 1                       | 0.9292 | 0.9443   | 0.9150    | 0.9598   | 0.9545   | T2/T3               |
| 2                       | 0.9252 | 0.9660   | 0.8953    | 0.9390   | 0.9484   | T1/T3               |
| 3                       | 0.8778 | 0.7200   | 0.8629    | 0.8026   | 0.7816   | T3/T5               |
| 4                       | 0.9649 | 0.9727   | 0.9442    | 0.9569   | 0.9588   | T4/T1               |
| 5                       | 0.9762 | 0.9818   | 0.9581    | 0.9605   | 0.9615   | T6/T1               |
| 6                       | 0.9518 | 0.9648   | 0.9475    | 0.9662   | 0.9681   | T5/T2               |
| 7                       | 0.8929 | 0.8638   | 0.9126    | 0.8759   | 0.9001   | T5/T6               |
| 8                       | 0.9275 | 0.9367   | 0.9336    | 0.9438   | 0.9525   | T2/T4               |
| 9                       | 0.9240 | 0.9428   | 0.9071    | 0.9536   | 0.9559   | T4/T6               |
| Mean                    | 0.9299 | 0.9215   | 0.9196    | 0.9287   | 0.9313   |                     |
